# Supplementary material for: Comparative Analysis of Gene Regulation by the Transcription Factor PPARα between Mouse and Human
Source: PLoS One. 2009 Aug 27;4(8):e6796. doi: 10.1371/journal.pone.0006796 (PMC2729378; doi:10.1371/journal.pone.0006796)
Supplement: Table S1 — Overlapping and species-specific list of significantly upregulated (1_1) and downregulated (1_2) genes in mouse and human primary hepatocytes after treatment with Wy14643 (6 h and/or 24 h). Genes were designated as significantly changed if satisfied the criteria of P<0.05 and mean fold change (MFC)>±1.1. (0.24 MB XLS) [file pone.0006796.s005.xls]

## Sheet: Table S1
Table S1_1
Mouse Specific	Mouse EGID
Ehhadh	74147
G0s2	14373
Lgals4	16855
Fbp2	14120
Acot4	171282
Pxmp4	59038
Plat	18791
4930579G24Rik	75939
Aadacl1	320024
Rbed1	232089
Rnf186	66825
Akp2	11647
Tacc2	57752
Mgll	23945
Rab30	75985
2310076L09Rik	66968
Gm672	269037
Peci	23986
St3gal5	20454
Rab9	56382
Odz3	23965
Cpt1b	12895
Nle1	217011
Tmcc3	319880
Myom1	17929
Oplah	75475
Gm288	239083
1300010F03Rik	219189
Prune	229589
Lrfn3	233067
Lipe	16890
Lamb3	16780
9530008L14Rik	109254
Grpel2	17714
Pctk3	18557
Decr1	67460
Crot	74114
Ucp2	22228
Jhdm1d	338523
Ddx28	71986
Chkb	12651
Sgms1	208449
Sdccag8	76816
Smox	228608
Ate1	11907
Hk1	15275
2210010N04Rik	70381
Ppp2r2d	52432
Rpia	19895
Foxa1	15375
A230051G13Rik	216792
Mapre3	100732
Ddb2	107986
Spin4	270624
Tmtc2	278279
Hyal1	15586
Inhbe	16326
Slc25a22	68267
Tcfec	21426
Ppargc1b	170826
Chd3	216848
Adck2	57869
Pim3	223775
Pllp	67801
Sox9	20682
Lrp4	228357
Clp1	98985
Bpgm	12183
Ripk2	192656
St5	76954
6530401C20Rik	231842
Glul	14645
Ankrd47	80880
Cldn23	71908
Prrg4	228413
Rrp12	107094
Foxp1	108655
Tnfaip2	21928
Aldh3a2	11671
Bace1	23821
4930528F23Rik	75178
Qpct	70536
Ets2	23872
St14	19143
Dyrk2	69181
Rin2	74030
Cda	72269
Slc5a6	330064
Baiap2l1	66898
Hyal2	15587
Dci	13177
Paqr7	71904
Cars2	71941
Pvrl2	19294
Acadl	11363
Lpin2	64898
A530050D06Rik	104816
Tenc1	209039
Nt5dc2	70021
Uts2	24111
Tsen54	76265
Sulf2	72043
Paqr9	75552
Crat	12908
Centa2	216991
Igf2bp2	319765
Mogat1	68393
Lrrc39	109245
Gramd3	107022
Agpat3	28169
2410016O06Rik	71952
Dot1l	208266
Arhgap6	11856
Zfp746	69228
Stil	20460
4930504E06Rik	75007
Casp8	12370
Dusp5	240672
Armc10	67211
Gas2l3	237436
Acad11	102632
1100001H23Rik	66857
Rpo1-2	20017
Ppcs	106564
Ptplad1	57874
D16Ertd472e	67102
1110054O05Rik	66209
Pus3	67049
Tnip1	57783
Foxred2	239554
Ccdc85b	240514
Erc2	238988
Specc1l	74392
Tmem184a	231832
6720458F09Rik	328162
LOC634731	634731
Nup210	54563
Stk16	20872
Igfals	16005
Trim6	94088
Slc16a6	104681
Eml3	225898
Pus7l	78895
Fosl1	14283
Etv6	14011
AK122209	382038
Nudt7	67528
Lpxn	107321
Dapk1	69635
Igf2r	16004
Zc3h8	57432
Ccdc137	67291
Csta	209294
Pdxp	57028
Adprhl2	100206
Bcl2l13	94044
Ccdc110	212392
Tmem171	380863
Cacna1a	12286
Polm	54125
Fcgrt	14132
Hif1a	15251
Arhgap5	11855
Mdn1	100019
Ank	11732
Tirap	117149
Arl2	56327
Cxcr7	12778
Bcl6	12053
Mast4	328329
4831426I19Rik	212073
Cox6b2	333182
Rsf1	233532
A830007P12Rik	227612
Zfp446	269870
Asb17	66772
1110033M05Rik	68675
Cidea	12683
Clock	12753
Smap1l	69780
E130016E03Rik	623474
Ptpn14	19250
Hes1	15205
Cbfa2t3h	12398
Timm9	30056
Zfp770	228491
D930001I22Rik	228859
Sgms2	74442
Lcn13	227627
Akap13	75547
Ofd1	237222
Nr2c1	22025
Srebf1	20787
Las1l	76130
Plvap	84094
A930006D11Rik	278304
Snx8	231834
Acat1	110446
Pla2g4b	211429
Cachd1	320508
Cln8	26889
Arsj	271970
Ermp1	226090
Hmg20a	66867
Myo5a	17918
Inpp1	16329
LOC620695	620695
4921507P07Rik	70821
Fbxo21	231670
Slc39a6	106957
Xpo6	74204
Dnmt3a	13435
2610024G14Rik	56412
Pip4k2b	108083
Leng1	69757
Cldn14	56173
Mia2	338320
2310005P05Rik	67484
Nat13	72117
Ruvbl2	20174
Wdr73	71968
Adamts1	11504
Prr15	78004
AW125753	105005
Zdhhc5	228136
Rcbtb1	71330
Abhd6	66082
Cdca7	66953
Wfdc3	71856
Slc12a2	20496
Gp2	67133
Glcci1	170772
Atg9b	213948
Adcy6	11512
Pcdh1	75599
Gdf15	23886
Enc1	13803
BC038822	239647
Hccs	15159
Eif2s1	13665
6430517E21Rik	240843
Frmd6	319710
Ddx25	30959
Dpys	64705
Sp8	320145
Cenpa	12615
Zdhhc18	503610
Sipa1l3	74206
Gnat1	14685
Tchp	77832
Fbxl11	225876
Prrt1	260297
Cnksr1	194231
2410018C17Rik	74504
Pwp2	110816
Rap2a	76108
Pds5a	71521
Bag2	213539
Gja4	14612
2310073E15Rik	75692
Kctd3	226823
Grwd1	101612
Iqsec1	232227
Col17a1	12821
Coil	12812
Supt3h	109115
Oraov1	72284
Pdzrn3	55983
Cd36	12491
Ncoa5	228869
Brf1	72308
Phc2	54383
Irf2bp2	270110
Kbtbd11	74901
Rdh13	108841
Nusap1	108907
8430410A17Rik	232210
Map3k4	26407
Relb	19698
Coq3	230027
Aph1b	208117
Med27	68975
Psmf1	228769
Nr2e3	23958
Klk1b24	16617
Mllt11	56772
Anxa10	26359
Bzw2	66912
Clpx	270166
Def8	23854
Herc1	235439
Ptp4a3	19245
Actl7b	11471
D14Ertd500e	219072
Rrp1b	72462
Usp10	22224
Palmd	114301
Jun	16476
Trim39	79263
Adh4	26876
Angptl2	26360
Myo5b	17919
Hspa4	15525
Dnajc16	214063
Syt8	55925
Polg	18975
Nbn	27354
Spire1	68166
Dand5	23863
Cblb	208650
Wnt8a	20890
Rbm12	75710
Mybl1	17864
Nob1	67619
Prkcdbp	109042
Tceal1	237052
Trib3	228775
Lmo4	16911
Smyd3	69726
Qser1	99003
Osgin2	209212
Trim47	217333
Atg2b	76559
Zbtb17	22642
Map2k5	23938
Ccng2	12452
Cdkal1	68916
Rnf111	93836
Leo1	235497
1110067D22Rik	216551
Nid2	18074
Fnbp4	55935
Csnk2a2	13000
Pnoc	18155
C030019I05Rik	320116
Efcbp2	117148
Ccr4	12773
Slc17a6	140919
Arhgef12	69632
Tbc1d10b	68449
Cyp4f15	106648
Tmem131	56030
Map2k2	26396
Stam	20844
Nln	75805
Sf3b3	101943
Mef2d	17261
Morc4	75746
Sppl3	74585
1110021L09Rik	76306
Nck2	17974
Serac1	321007
4930506M07Rik	71653
Qtrtd1	106248
Enpp4	224794
Usp36	72344
Jmjd1c	108829
Rcc2	108911
Zc3hc1	232679
Mog	17441
Slc16a1	20501
Zfp672	319475
Cdc42se1	57912
Itsn2	20403
Tmem16d	320091
Sorbs3	20410
Cylc1	67407
Drctnnb1a	84652
Dock5	68813
Sulf1	240725
Dnmbp	71972
Jak3	16453
Tsr1	104662
Brap	72399
Zcchc9	69085
Slc25a46	67453
Bbs9	319845
Ly6d	17068
Add3	27360
Cmbl	69574
Acvr2a	11480
Optn	71648
Ripply2	382089
Ube2z	268470
Mcat	223722
D13Wsu177e	28126
Mtmr12	268783
Sphk1	20698
Socs7	192157
Eif2ak3	13666
Inppl1	16332
4931429I11Rik	70989
Col5a2	12832
5830411G16Rik	78937
Tmem144	70652
Zfp574	232976
Polr3g	67486
4932432K03Rik	74385
Sgsm2	97761
Arid2	77044
Mttp	17777
Pex14	56273
Zfp235	56525
Gadd45b	17873
Dnajc5b	66326
Baz1a	217578
Onecut1	15379
BC004728	207818
Aff4	93736
Unc13d	70450
Pus1	56361
Pex12	103737
Sec24a	77371
BC057893	272027
Hd	15194
Nmb	68039
Atp13a1	170759
Adipor2	68465
Larp1	73158
Lrrc4b	272381
Ccdc106	232821
Llgl1	16897
Usp21	30941
Ddx31	227674
Cry1	12952
Rps6ka1	20111
Phf7	71838
Bcar1	12927
Btbd11	74007
Dgcr8	94223
Cugbp2	14007
Bmpr1a	12166
Pacsin3	80708
Neurl2	415115
Ptpn1	19246
Col5a1	12831
Dopey2	70028
1500041B16Rik	380686
Atpbd1b	100210
Asb10	117590
Gabra6	14399
Gpr172b	52710
Ubash3a	328795
Aldh1a1	11668
Git2	26431
Ncor1	20185
Ankrd10	102334
Tectb	21684
Glyat	107146
9630050M13Rik	269233
Cdh6	12563
40787	52398
Jmjd6	107817
Arfrp1	76688
Rnf166	68718
Rnf44	105239
Runx1t1	12395
Kti12	100087
Pcyt1b	236899
Dus4l	71916
Zfp276	57247
Tapt1	231225
Ubr5	70790
Hsd17b11	114664
Ctdp1	67655
Mel13	217149
Pnliprp2	18947
Onecut2	225631
Cpox	12892
Snx9	66616
Snapc1	75627
Mllt4	17356
6230409E13Rik	76132
LOC100042830	100042830
Etfb	110826
Bmp5	12160
Tcof1	21453
Serpine1	18787
Adnp	11538
Sar1b	66397
Ptges	64292
Was	22376
Acvr1	11477
Cep76	225659
Pbld	68371
Necap2	66147
Entpd5	12499
Ephx2	13850
Lphn2	99633
Igfbp2	16008
4931406I20Rik	66743
Wfdc1	67866
Hspb6	243912
Igsf11	207683
Pex1	71382
Rasal2	226525
Rnf216	108086
4930583H14Rik	67749
Ppp2r5c	26931
Dgkh	380921
Cdc42ep3	260409
Neu3	50877
Pcgf5	76073
Galk1	14635
Adra2a	11551
Foxn2	14236
Pnpla8	67452
Decr2	26378
Slfnl1	194219
Nr2f1	13865
Ghrh	14601
Glrx	93692
Pex16	18633
Cav1	12389
Hadh	15107
Pdss1	56075
Mettl7b	71664
Mpp1	17524
Trpv2	22368
Lman2l	214895
Impdh1	23917
Tinagl	94242
Accn5	58170
Tanc2	77097
Muc1	17829
Cpne5	240058
Camkk2	207565
4931406C07Rik	70984
Creg1	433375
Tmem47	192216
Nnt	18115
Nek1	18004
Bche	12038
Mettl9	59052
Grhpr	76238
Pdk1	228026
Nudt19	110959
Adipoq	11450
Mab21l2	23937
Orai3	269999
Perld1	320655
Eya1	14048
EG544888	544888
Tmem64	100201
Ddx51	69663
Guca1b	107477
Ifrd2	15983
Comt	12846
D0H4S114	27528
D11Wsu47e	276852
Cpne9	211232
Trim7	94089
Glp1	100009600
Cpa5	74649
Scd1	20249
Depdc6	97998
Csad	246277
Cst11	78240
Adh1	11522
Pigo	56703
Pacsin1	23969
Fabp2	14079
Max	17187
Aqp11	66333
Slc47a1	67473
A330102K23Rik	77771
Iqcf1	74267
G6pdx	14381
Dhx58	80861
2600011E07Rik	72125
Suclg1	56451
Exosc2	227715
Prdm8	77630
Gpd1	14555
Col4a5	12830
Lonp2	66887
Tekt5	70426
Lipa	16889
Ttl	69737
Bcs1l	66821
Egf	13645
Fahd2a	68126
Bbx	70508
Smarcd3	66993
0610009O20Rik	66839
Fgf1	14164
Hfe2	69585
Mamdc2	71738
Glra3	110304
Sccpdh	109232
Ube2d1	216080
Pou3f4	18994
LOC100042150	100042150
Raly	19383
Syt9	60510
Cpne6	12891
Rtp4	67775
Spata19	75469
Fbxo39	327959
Chd4	107932
Ap1g2	11766
Ppapdc2	74411
Zar1	317755
Mlana	77836
Chpt1	212862
Krtap3-2	66708
2610019A05Rik	72149
Phox2a	11859
Stat1	20846
Pou4f2	18997
Myh3	17883
Peg3	18616
EG434128	434128
Gpsm3	106512
Hlcs	110948
Zbp1	58203
A2m	232345
Mylk	107589
Stox2	71069
Gpr171	229323
Cyp2s1	74134
Anpep	16790
Fas	14102
Il17a	16171
Rab5c	19345
Oaz3	53814
Cbr1	12408
AV249152	216560
Hspa2	15512
Adam32	353188
BC038925	330216
Rcbtb2	105670
Fahd1	68636
Slco2b1	101488
Mpst	246221
Bhlhb9	70237
Gstm4	14865
BC016495	225994
Prlr	19116
Grem2	23893
LOC675812	675812
Nlrp12	378425
Human Specific	Human EGID
MBL2	4153
TSKU	25987
ASPA	443
SUCNR1	56670
KIAA1881	729359
POR	5447
CYP3A4	1576
TTC7B	145567
SULT1B1	27284
OASL	8638
SULT1E1	6783
SLC25A33	84275
PANK1	53354
TMCO6	55374
CYP2B6	1555
ALDH3A1	218
PCK1	5105
CYP3A7	1551
IGF2BP3	10643
TNFRSF1B	7133
GPX2	2877
COTL1	23406
CYP3A43	64816
N4BP2L1	90634
SLC38A4	55089
PHKA2	5256
LGI1	9211
IFIT2	3433
EIF4EBP2	1979
VLDLR	7436
GALT	2592
TMEM135	65084
PIR	8544
MERTK	10461
RHOF	54509
PROX1	5629
TRAF3IP2	10758
ITGB6	3694
ACSM3	6296
ACBD4	79777
ACSL5	51703
SLC7A7	9056
SYTL4	94121
INHBB	3625
SEC16B	89866
XK	7504
AQP3	360
SPINT1	6692
ABCG2	9429
CYP3A5	1577
CEBPA	1050
ALAS1	211
DMKN	93099
DIRAS2	54769
LAMA4	3910
SH2B3	10019
PPTC7	160760
THSD7A	221981
DCUN1D3	123879
C19orf12	83636
CA12	771
FICD	11153
THBS2	7058
FHL1	2273
CYP1A2	1544
LOC55908	55908
ITGB2	3689
AKR1B10	57016
VSTM2L	128434
RARRES1	5918
PRODH2	58510
GRHL1	29841
C17orf100	388327
TNFRSF21	27242
SYT12	91683
ESPL1	9700
ANGPTL1	9068
SLC19A3	80704
PHLPP	23239
TXNRD1	7296
DCBLD1	285761
SQSTM1	8878
CDC42BPA	8476
GABRE	2564
BICC1	80114
MRGPRF	219928
DOCK10	55619
DNM1	1759
GJB2	2706
TTLL7	79739
ABCC2	1244
CXorf38	159013
SLC4A4	8671
USP13	8975
CYP2J2	1573
NSUN6	221078
ATP9A	10079
CCL20	6364
HSPB9	94086
KANK1	23189
C16orf14	84331
PEMT	10400
WNT5A	7474
SCHIP1	29970
SLC1A4	6509
PHGDH	26227
DDX60	55601
GCOM1	145781
SNX33	257364
GTF3C4	9329
DIO1	1733
APOA5	116519
GADD45A	1647
LOC147645	147645
FLJ10357	55701
ACADM	34
WFS1	7466
CYP39A1	51302
SLC23A1	9963
IFIT1	3434
ARHGAP21	57584
IL18R1	8809
SLC30A10	55532
AADAC	13
MTHFD2	10797
RRN3	54700
KLHL36	79786
AZIN1	51582
EPHB4	2050
AGXT2L1	64850
ARMC6	93436
EFNA1	1942
SEMA5A	9037
TGIF1	7050
C17orf97	400566
CCRK	23552
SLC29A3	55315
C4orf19	55286
FAH	2184
ANKRD35	148741
CYB5A	1528
CUX2	23316
ARHGAP24	83478
CRYM	1428
DDO	8528
FADS1	3992
C22orf13	83606
PMP22	5376
PTGR1	22949
DNAJC17	55192
ABCC3	8714
CYP21A2	1589
LEPR	3953
TFRC	7037
PTPN4	5775
THRB	7068
PHLPPL	23035
JARID2	3720
CAT	847
HLX	3142
GJB6	10804
SPINT2	10653
GPHN	10243
FAM160B1	57700
SLC6A14	11254
IRF8	3394
RPS6KL1	83694
KIAA0182	23199
ATF7IP2	80063
KIAA0355	9710
ACPL2	92370
GDPD1	284161
ARRDC4	91947
ECHDC3	79746
NUP88	4927
STK39	27347
SHROOM2	357
MGST3	4259
LIAS	11019
C10orf2	56652
PEX19	5824
CACNG7	59284
PPARA	5465
CHKA	1119
OCEL1	79629
ABHD2	11057
GPT2	84706
RDH10	157506
MGC4172	79154
RSAD1	55316
PRCC	5546
ST6GALNAC4	27090
SLC7A5	8140
SRPX	8406
NPR2	4882
DHCR7	1717
COL16A1	1307
TMEM139	135932
C14orf45	80127
CTNS	1497
STAU1	6780
MAP3K14	9020
DTWD1	56986
APOBEC4	403314
VEGFB	7423
SLMO2	51012
FBXO8	26269
LYRM1	57149
NCKIPSD	51517
TGFA	7039
C15orf26	161502
CENTD2	116985
ERO1LB	56605
XDH	7498
ZNF624	57547
AFAP1L1	134265
SLC39A7	7922
SRRM1	10250
APOA2	336
MUTYH	4595
FXN	2395
C10orf54	64115
CERK	64781
LIM2	3982
PKIB	5570
MAPK8IP1	9479
LGR6	59352
LGALS8	3964
LRP5	4041
CRIP1	1396
KEAP1	9817
ARMCX2	9823
C6orf106	64771
PAN2	9924
FAM151A	338094
ZBTB33	10009
UNQ9391	203074
AKR1C1	1645
LTBP1	4052
ABHD4	63874
BLMH	642
PLEKHF1	79156
AFAP1	60312
POFUT1	23509
CRYL1	51084
GARNL4	23108
FAM129A	116496
DLC1	10395
SYT17	51760
REPS1	85021
THNSL1	79896
SFRS16	11129
CA11	770
RPAIN	84268
GTPBP10	85865
FRMD3	257019
LIPC	3990
CDC42EP4	23580
C1orf116	79098
THBS1	7057
ME1	4199
HACL1	26061
SIX3	6496
GAL	51083
RNF219	79596
SPTBN2	6712
ABCB1	5243
FGFR2	2263
ZNF518B	85460
RSPH1	89765
CEBPD	1052
LAG3	3902
TMEM161A	54929
TTC7A	57217
C12orf49	79794
ZNF286A	57335
MBD4	8930
TKT	7086
GUCY2D	3000
ILVBL	10994
OSTbeta	123264
UCHL1	7345
OCRL	4952
C9orf119	375757
C9orf43	257169
GCKR	2646
C14orf149	112849
DVL3	1857
SASS6	163786
LRCH3	84859
CCDC63	160762
CPD	1362
tcag7.1228	254048
TMEM97	27346
XPC	7508
CHL1	10752
MAN2B2	23324
KIAA0146	23514
UHMK1	127933
PTER	9317
AP3S2	10239
TOE1	114034
KIAA0194	22993
TMEFF1	8577
MLH3	27030
MRPL46	26589
CDC6	990
FSTL1	11167
MCCC2	64087
WNT7A	7476
RSHL3	345895
PSAT1	29968
KLHDC7A	127707
FUT1	2523
CYP11A1	1583
TUSC1	286319
TMEM140	55281
EPDR1	54749
ETFA	2108
NSMAF	8439
DOCK4	9732
DLG5	9231
LY86	9450
ZNF354A	6940
PI4KB	5298
PREB	10113
FBXL21	26223
MEGF8	1954
LOC116236	116236
REEP6	92840
PRSS35	167681
TRIB2	28951
INTS4	92105
TBX15	6913
FHL2	2274
ARFIP2	23647
LITAF	9516
COG3	83548
AGXT	189
CDO1	1036
MTCP1	4515
HIGD1A	25994
SPEN	23013
C2orf18	54978
ZP2	7783
SLC20A1	6574
FAM40A	85369
TSHB	7252
ZFAND2A	90637
SLC25A12	8604
CSRP3	8048
ANKRD44	91526
NPC1	4864
ZCCHC11	23318
HECA	51696
RERE	473
ST6GALNAC3	256435
WDR85	92715
GEMIN5	25929
NCOA6	23054
CCND1	595
TNNI1	7135
FKBPL	63943
CCDC51	79714
KLHL8	57563
GTPBP5	26164
ASPH	444
HIST1H3B	8358
FXC1	26515
DNPEP	23549
RLBP1L2	134829
ANKRD13A	88455
PATL1	219988
WRN	7486
MAML2	84441
CECR5	27440
HM13	81502
BHMT2	23743
CILP	8483
GRIP1	23426
ARPP-21	10777
SCAMP1	9522
PKHD1	5314
NSUN3	63899
RND3	390
TMEM214	54867
PAK2	5062
GRPEL1	80273
TRMT11	60487
ITGA6	3655
C14orf115	55237
PGBD5	79605
KIAA0892	23383
CCDC41	51134
WSB1	26118
LPCAT1	79888
MFNG	4242
CDAN1	146059
TMEM185A	84548
C10orf47	254427
HPDL	84842
AGPS	8540
BET1	10282
TRPC6	7225
C2orf51	200523
SHROOM1	134549
LRP6	4040
NARG2	79664
C20orf106	200232
AK3	50808
PTCD1	26024
SLU7	10569
OXSM	54995
ZNF575	284346
TMEM49	81671
DNAJA2	10294
EPB41	2035
NUMBL	9253
ORC5L	5001
CAPN7	23473
B3GNT9	84752
EBF1	1879
ASGR1	432
MARS2	92935
LOC26010	26010
TTLL4	9654
RWDD2A	112611
SLC25A37	51312
CABC1	56997
DDX21	9188
SLMAP	7871
C1QA	712
BRWD3	254065
MAML1	9794
GABARAPL1	23710
RAD23B	5887
TRIM27	5987
FTH1	2495
SELI	85465
LOC347475	347475
ABCD2	225
CISD2	493856
ELOVL6	79071
EIF2AK4	440275
PHACTR2	9749
C13orf27	93081
TBXAS1	6916
NFXL1	152518
RP1-93P18.1	126917
SEC14L4	284904
HIC2	23119
PPARD	5467
PDE3A	5139
ARV1	64801
SCT	6343
ABHD8	79575
FLCN	201163
C9orf93	203238
ZNF292	23036
MTR	4548
CYP2U1	113612
CCDC58	131076
RAB11FIP2	22841
IPO4	79711
TOMM40L	84134
KRAS	3845
ZCCHC17	51538
ANAPC10	10393
MBTPS1	8720
C17orf39	79018
TUBE1	51175
SEC24D	9871
MGA	23269
DICER1	23405
SUDS3	64426
RASGRP3	25780
IBTK	25998
KIAA0256	9728
C9orf91	203197
WDR78	79819
KDELC2	143888
APBB1IP	54518
SGOL2	151246
TTC8	123016
C6orf26	401251
ANKRD11	29123
B4GALT4	8702
MDC1	9656
LTV1	84946
C1orf109	54955
ARL5B	221079
RNF19A	25897
DHX33	56919
CHSY1	22856
NDP	4693
WWC1	23286
GOLPH3L	55204
SMG1	23049
SLC45A3	85414
FAM55D	54827
NUP214	8021
TMCO2	127391
ANKRD5	63926
REEP2	51308
METTL1	4234
CSRP2BP	57325
MBIP	51562
RNF17	56163
TERF2	7014
NPAS2	4862
MED1	5469
PPAT	5471
RHPN2	85415
WNK4	65266
PRR3	80742
BATF2	116071
ZSCAN18	65982
C12orf32	83695
HOXD11	3237
MMACHC	25974
DDX24	57062
C8orf76	84933
NANOS1	340719
KLRK1	22914
CYP46A1	10858
C18orf45	85019
RNF165	494470
BRD7	29117
HUNK	30811
PPRC1	23082
C2CD2	25966
CTXN1	404217
WDR53	348793
TMEM128	85013
COX4I2	84701
GPR18	2841
NLGN1	22871
ZDBF2	57683
RGL3	57139
FBXL4	26235
LRRN4	164312
ZNF710	374655
DQX1	165545
SSH1	54434
PDCL	5082
PAK1IP1	55003
TTLL5	23093
CTHRC1	115908
TTC29	83894
GFRA1	2674
ASZ1	136991
ZBTB9	221504
CKAP2	26586
DKK2	27123
IL21	59067
FAM98B	283742
C14orf118	55668
B4GALNT1	2583
PDCL2	132954
FZD7	8324
C2orf63	130162
CCNB1	891
SLFN13	146857
C9orf9	11092
ZDHHC13	54503
C3orf18	51161
LY75	4065
TTF2	8458
NOSTRIN	115677
Overlapping	Mouse EGID	Human EGID
PDK4	27273	5166
TXNIP	56338	10628
SLC22A5	20520	6584
HMGCS2	15360	3158
SLC25A42	73095	284439
SGK2	27219	10110
ANGPTL4	57875	51129
HSDL2	72479	84263
VNN1	22361	8876
CREB3L3	208677	84699
TOR3A	30935	64222
MLYCD	56690	23417
MAP3K8	26410	1326
KLF10	21847	7071
ACSL1	14081	2180
PEX11A	18631	8800
CPT1A	12894	1374
MMD	67468	23531
IVL	16447	3713
SLC25A34	384071	284723
IMPA2	114663	3613
CPT2	12896	1376
KLF11	194655	8462
GPAM	14732	57678
CIDEC	14311	63924
SLC25A20	57279	788
SNRK	20623	54861
FRK	14302	2444
ABCB4	18670	5244
ADFP	11520	123
ABCD3	19299	5825
PNPLA2	66853	57104
HADHA	97212	3030
ETFDH	66841	2110
STK10	20868	6793
FABP1	14080	2168
ACOT12	74156	134526
KLF4	16600	9314
ACOX1	11430	51
SERINC2	230779	347735
GPR146	80290	115330
TRIM25	217069	7706
ALDH9A1	56752	223
RETSAT	67442	54884
ECH1	51798	1891
SLC27A2	26458	11001
PAPSS2	23972	9060
RAPGEF4	56508	11069
TSC22D1	21807	8848
HSD17B4	15488	3295
HADHB	231086	3032
MMP15	17388	4324
ABCA1	11303	19
NRIP1	268903	8204
ACSL3	74205	2181
NOC3L	57753	64318
RAB20	19332	55647
SLC27A4	26569	10999
FGF21	56636	26291
LARGE	16795	9215
MYD88	17874	4615
ACADVL	11370	37
IFRD1	15982	3475
KLHL21	242785	9903
GALNT2	108148	2590
MID1	17318	4281
ORMDL3	66612	94103
HECTD1	207304	25831
TMPRSS2	50528	7113
ARHGEF10L	72754	55160
MFN2	170731	9927
ZCCHC2	227449	54877
ROBO1	19876	6091
DTX4	207521	23220
MYBBP1A	18432	10514
HMOX1	15368	3162
CD14	12475	929
TRAK1	67095	22906
PIGM	67556	93183
RRS1	59014	23212
WDR43	72515	23160
UTP20	70683	27340
PGS1	74451	9489
KRT23	94179	25984
FRMD4A	209630	55691
SH3BGRL2	212531	83699
ACAA2	52538	10449
IL15RA	16169	3601
KCTD21	622320	283219
G6PC	14377	2538
CTSE	13034	1510
PCTP	18559	58488
MOSC1	66112	64757
VNN3	26464	55350
SDCBP2	228765	27111
ACADS	11409	35
ABHD3	106861	171586
TDO2	56720	6999
HS3ST6	328779	64711
RDH16	19683	8608
TMED5	73130	50999
SERPINB9	20723	5272
IRF7	54123	3665
EPHX1	13849	2052
FBP1	14121	2203
IRAK2	108960	3656
DHRS3	20148	9249
OPRS1	18391	10280
F830021D11Rik	224648	54887
D8Ertd587e	52335	342371
ZFP295	114565	49854
ZFP740	68744	283337
BC048403	270802	144577
1700007K13RIK	69327	138162
1300001I01RIK	74148	23277
C230093N12RIK	98952	399665
AI132487	104910	283600
MBOAT5	14792	10162
A230097K15RIK	231510	84803
CYP4A10	13117	1579
2310016C08RIK	69573	29923
VNN3	26464	8875
ACAA1A	113868	30
GYK	14933	2710
4930544O15RIK	75173	374973
Table S1_2
Mouse Specific	Mouse EGID
38047	381270
0610007P14Rik	58520
0610010D20Rik	67432
1110008J03Rik	100764
1110020G09Rik	68646
1110059E24Rik	66206
1300018J18Rik	223776
1500032D16Rik	78330
1700009P17Rik	75472
1700012A16Rik	71836
1700021C14Rik	76927
1700026L06Rik	69987
1700066M21Rik	73467
1700093K21Rik	67358
1700125H20Rik	73634
1810011O10Rik	69068
1810020D17Rik	66273
1810027O10Rik	69186
2010004A03Rik	76527
2010007H12Rik	69871
2010100O12Rik	67067
2010106G01Rik	66552
2010107G23Rik	69894
2210018M11Rik	233545
2310005E10Rik	67861
2310016C16Rik	69590
2310046K01Rik	69698
2310066E14Rik	75687
2510009E07Rik	72190
2610529C04Rik	67075
2810022L02Rik	67198
2810405K02Rik	66469
2900024O10Rik	72852
2900092C05Rik	73090
3110031B13Rik	67288
3110040N11Rik	67290
4631416L12Rik	622434
4921505C17Rik	78757
4922505E12Rik	433386
4930519B02Rik	75122
4930521A18Rik	74708
4931407G18Rik	70977
4931414P19Rik	74359
4933400E14Rik	71007
4933406J08Rik	74401
5033414K04Rik	98496
5730593F17Rik	215512
5730596K20Rik	109168
6330439K17Rik	241688
6330503K22Rik	101565
6430598A04Rik	243300
6530404N21Rik	67795
8430415E04Rik	74521
9030025P20Rik	381062
9030625A04Rik	210808
9130005N14Rik	68303
9130221D24Rik	77669
9430069J07Rik	211383
9530077C05Rik	68283
9930021J17Rik	229488
A530088I07Rik	212167
A830007P12Rik	227612
AA986860	212439
Abca8b	27404
Abcb11	27413
Abcc9	20928
Abcg8	67470
Abhd2	54608
Ablim3	319713
Acadsb	66885
Acbd4	67131
Acrv1	11451
Acsm1	117147
Acy1	109652
Adamts2	216725
Adamtsl4	229595
Adcy2	210044
Adra1b	11548
Adrb2	11555
Aff3	16764
Aggf1	66549
Agxt	11611
Ahr	11622
AI593442	330941
Akap12	83397
Akr1d1	208665
Aldh4a1	212647
Aldh8a1	237320
Alpk3	116904
Ampd3	11717
Angptl3	30924
Ank3	11735
Ankrd13c	433667
Ankrd26	232339
Ankrd29	225187
Ankrd37	654824
Ankrd57	268301
Anks4b	72074
Ap3m1	55946
Aph1b	208117
Apom	55938
Arfgap1	228998
Arfgap3	66251
Arg1	11846
Arhgap24	231532
Arhgef19	213649
Arl5b	75869
Armcx3	71703
Armet	74840
Arrb2	216869
Arrdc2	70807
Arrdc3	105171
Arrdc4	66412
Arv1	68865
Asb11	68854
Asb15	78910
Atoh8	71093
Atp13a4	224079
Atp4b	11945
Atp7a	11977
Atp8a1	11980
Atp8b1	54670
Atpif1	11983
Avpr1a	54140
Azi1	12009
B230342M21Rik	100637
B3galnt1	26879
B3galt1	26877
Baat	12012
Bahd1	228536
Bambi	68010
Bat2d	226562
Bat5	193742
Batf2	74481
BC021608	192653
BC022224	192970
BC048599	232717
BC051227	234384
BC052040	399568
BC056474	414077
Bcdo2	170752
Bckdha	12039
Bcl2l14	66813
Bcmo1	63857
Bdh1	71911
Bet1l	54399
Bex2	12069
Bhmt2	64918
Bicc1	83675
Blk	12143
Blzf1	66352
Bmper	73230
Bok	51800
Bphl	68021
Bsdc1	100383
Btg2	12227
Bub1	12235
Bud13	215051
C030046E11Rik	226089
C2	12263
C630004H02Rik	217310
C730027J19Rik	272428
Cab39l	69008
Camk1	52163
Car11	12348
Casp9	12371
Cbx4	12418
Cbx8	30951
Cc2d1b	319965
Ccbp2	59289
Ccdc11	74453
Ccdc68	381175
Ccdc96	66717
Ccl20	20297
Ccl25	20300
Ccnb2	12442
Ccne1	12447
Ccnt2	72949
Ccpg1	72278
Cd200	17470
Cd28	12487
Cd34	12490
Cd97	26364
Cdc14b	218294
Cdc20	107995
Cdc2l6	78334
Cdc42ep4	56699
Cdca8	52276
Cdh17	12557
Cdh7	241201
Cdo1	12583
Cebpd	12609
Cenpm	66570
Cep152	99100
Cfi	12630
Chac2	68044
Chrd	12667
Cish	12700
Cited1	12705
Cited2	17684
Clcn2	12724
Cldn1	12737
Cnih2	12794
Cntn1	12805
Cobl	12808
Col15a1	12819
Crabp1	12903
Creb1	12912
Creb3l2	208647
Crebl1	12915
Crmp1	12933
Crocc	230872
Crp	12944
Cryl1	68631
Csrp2	13008
Csrp3	13009
Cst6	73720
Cth	107869
Cxadr	13052
Cxcl1	14825
Cxcl13	55985
Cxcl5	20311
Cyb5	109672
Cyld	74256
Cyp26a1	13082
Cyp2b10	13088
Cyp2c39	13098
Cyp2j6	13110
Cyp2r1	244209
Cyp39a1	56050
Cyp3a13	13113
Cyp3a25	56388
Cyp3a44	337924
Cyp4v3	102294
Cyp51	13121
D230014K01Rik	217364
D2Ertd391e	51897
D4Bwg0951e	52829
D4Wsu114e	28010
D5Ertd40e	231630
Dapp1	26377
Dbt	13171
Dclk3	245038
Dcst2	329702
Ddef2	211914
Ddi1	71829
Ddx26b	236790
Dennd3	105841
Depdc7	211896
Dhx57	106794
Dmgdh	74129
Dnajb11	67838
Dnajb5	56323
Dnajc10	66861
Dnajc12	30045
Dnase2b	56629
Dok2	13449
Dom3z	112403
Donson	60364
Dpp7	83768
Dpyd	99586
Dsc2	13506
Dusp16	70686
E530011F12Rik	545279
Ecel1	13599
Edc3	353190
Efhc1	71877
Efhd2	27984
EG624219	624219
EG627607	627607
EG668145	668145
Egfr	13649
Egr1	13653
Ehbp1	216565
Eif1a	13664
Elf3	13710
Eme1	268465
Eno2	13807
Enpep	13809
Enpp3	209558
Entpd7	93685
Epha1	13835
Ero1lb	67475
Esr1	13982
Extl2	58193
F11	109821
F5	14067
Fahd1	68636
Fbxo4	106052
Fbxo5	67141
Fbxo6	50762
Fbxo8	50753
Fdft1	14137
Ferd3l	114712
Fes	14159
Fgb	110135
Fgg	99571
Fhl5	57756
Fignl1	60530
Fjx1	14221
Fli1	14247
Fmo2	55990
Fndc4	64339
Folr2	14276
Foxa2	15376
Foxj3	230700
Fsd1	240121
Fyb	23880
Fyn	14360
Gal3st1	53897
Gan	209239
Gas2	14453
Gata3	14462
Gckr	231103
Gcnt1	14537
Gdf2	12165
Gfpt1	14583
Ggps1	14593
Gldc	104174
Glrx2	69367
Gm2a	14667
Gm944	381126
Gmppb	331026
Gnpnat1	54342
Golga2	99412
Golgb1	224139
Golt1a	68338
Golt1b	66964
Gosr1	53334
Gosr2	56494
Gpatch3	242691
Gpc4	14735
Gpr160	71862
Gpr182	11536
Gpr3	14748
Gpr35	64095
Gpr68	238377
Gprasp1	67298
Gprc5b	64297
Gramd1c	207798
Gsdmdc1	69146
Gsn	227753
Gstt1	14871
Gstz1	14874
Gsx1	14842
Gtf2a2	235459
H2-DMb1	14999
H47	109815
Hal	15109
Hao1	15112
Hbegf	15200
Hc	15139
Hdhd3	72748
Herpud1	64209
Hes6	55927
Hic1	15248
Hint3	66847
Hist1h4h	69386
Hivep2	15273
Hmgb2l1	70823
Hmgcr	15357
Hmgn3	94353
Hnmt	140483
Homer3	26558
Hoxa1	15394
Hoxa5	15402
Hoxb13	15408
Hrasls5	66727
Hs3st5	319415
Hsd3b1	15492
Icam1	15894
Ifi27	76933
Igfbp1	16006
Ikbke	56489
Il17rb	50905
Il18bp	16068
Il2rg	16186
Il33	77125
Il9	16198
Indol1	209176
Ing3	71777
Inpp5f	101490
Ipmk	69718
Ipo11	76582
Ippk	75678
Irak3	73914
Irf5	27056
Irx3	16373
Itgb7	16421
Itih2	16425
Itpr3	16440
Jhdm1d	338523
Jmjd1b	277250
Kbtbd3	69149
Kcna7	16495
Kctd11	216858
Kdelr3	105785
Kif14	381293
Kif3c	16570
Kif5c	16574
Klc3	232943
Klf1	16596
Klf12	16597
Klf13	50794
Klhdc8b	78267
Klhl11	217194
Klhl14	225266
Klhl24	75785
Klhl25	207952
Klhl32	212390
Klkb1	16621
Kpna6	16650
Krt24	75706
Krt75	109052
Ktelc1	224143
Kynu	70789
Lancl2	71835
Lbp	16803
Ldhb	16832
Lgals1	16852
Lgi4	243914
Limd2	67803
Lman1l	235416
Lonrf3	74365
Lrrc3	237387
Lsp1	16985
Ltbp4	108075
Lyve1	114332
Maff	17133
Magel2	27385
Manbal	69161
Map4k1	26411
Mapk12	29857
Mbl2	17195
Mccc2	78038
Mdh1b	76668
Med11	66172
Mettl7a	70152
Mlstd2	67420
Mlx	21428
Mmp8	17394
Mpeg1	17476
Mphosph6	68533
Mphosph8	75339
Mpst	246221
Mro	71263
Ms4a6b	69774
Msh2	17685
Mt1	17748
Mt4	17752
Mthfd2	17768
Mtmr4	170749
Mtmr7	54384
Mtnr1a	17773
Mut	17850
Mvk	17855
Myo1b	17912
Myot	58916
Ncapg2	76044
Ndufa11	69875
Ndufa2	17991
Nedd9	18003
Nek8	140859
Nfkb1	18033
Nfkbie	18037
Nfxl1	100978
Nfyb	18045
Ngef	53972
Ngfb	18049
Nhedc1	74446
Nktr	18087
Nlgn1	192167
Nlrp9b	243874
Nmral1	67824
Nphp4	260305
Nr3c1	14815
Nsbp1	50887
Nthl1	18207
Nuak2	74137
Nudt22	68323
Numbl	18223
Nupr1	56312
Oaz3	53814
Olfm3	229759
Olfr64	18366
Olfr68	18369
Omd	27047
Osbpl1a	64291
Osmr	18414
Ostb	330962
Oxct1	67041
P2ry10	78826
P2ry14	140795
Papolg	216578
Pbx3	18516
Pcbd2	72562
Pcdh20	219257
Pcdhb3	93874
Pcmtd1	319263
Pcx	18563
Pdcd7	50996
Pdia5	72599
Pdia6	71853
Pfkfb1	18639
Pfkfb2	18640
Pglyrp2	57757
Pgm3	109785
Phf20l1	239510
Pigyl	66268
Pink1	68943
Pir	69656
Pla1a	85031
Plce1	74055
Pld1	18805
Plg	18815
Plxnb1	235611
Pnpla7	241274
Poli	26447
Popdc3	78977
Ppap2b	67916
Ppargc1a	19017
Ppef2	19023
Ppl	19041
Ppp1r12b	329251
Ppp1r13b	21981
Ppp1r14c	76142
Prkce	18754
Prkg1	19091
Prlr	19116
Prmt8	381813
Prop1	19127
Pros1	19128
Proz	66901
Prr16	71373
Psen2	19165
Psmb10	19171
Psmb9	16912
Pter	19212
Ptgfr	19220
Pthr2	213527
Ptplb	70757
Ptpn14	19250
Ptpre	19267
Pttg1	30939
Ptx3	19288
Qprt	67375
Rab4b	19342
Ralgps1	241308
Raph1	77300
Rasl12	70784
Rassf7	66985
Rbak	57782
Rbbp8	225182
Rbm15	229700
Rbp1	19659
Rcbtb2	105670
Rcl1	59028
Relb	19698
Rell1	100532
Reln	19699
Renbp	19703
Rilp	280408
Rims3	242662
Rnd1	223881
Rnf141	67150
Ropn1l	252967
RP23-233B9.8	622665
Rpa2	19891
Rpl22	19934
Rps6	20104
Rps6ka5	73086
Rps6kb2	58988
Rragd	52187
Rtp3	235636
Saa4	20211
Sacs	50720
Sc4mol	66234
Sc5d	235293
Scara5	71145
Scfd1	76983
Scn11a	24046
Scnn1a	20276
Sdc2	15529
Sdc4	20971
Sdccag10	67285
Sdf2l1	64136
Sds	231691
Sec13	110379
Sec14l4	103655
Sec16b	89867
Senp7	66315
Senp8	71599
Serac1	321007
Serpina10	217847
Serpina12	68054
Sertad3	170742
Sesn1	140742
Setmar	74729
Sgk3	170755
Sh2d3c	27387
Sh2d4a	72281
Sh3bgr	50795
Shmt1	20425
Six5	20475
Slbp	20492
Slc10a1	20493
Slc10a2	20494
Slc16a7	20503
Slc17a1	20504
Slc17a3	105355
Slc18a2	214084
Slc1a4	55963
Slc20a1	20515
Slc22a18	18400
Slc25a33	70556
Slc29a1	63959
Slc2a5	56485
Slc35a2	22232
Slc35d2	70484
Slc37a4	14385
Slc39a14	213053
Slc39a8	67547
Slc41a2	338365
Slc46a3	71706
Slc6a12	14411
Slc6a18	22598
Slc7a2	11988
Slco1a4	28250
Slfn8	276950
Slitrk3	386750
Snf1lk	17691
Snf1lk2	235344
Snx21	101113
Socs5	56468
Spata2L	78779
Spcs3	76687
Spg3a	73991
Spink3	20730
Spna1	20739
Spon1	233744
Spsb2	14794
Srd5a2	94224
Stab2	192188
Stap2	106766
Steap2	74051
Steap4	117167
Stk32c	57740
Stxbp3a	20912
Stxbp5	78808
Sufu	24069
Sult1a1	20887
Sult1e1	20860
Suox	211389
Sytl4	27359
Taf11	68776
Tanc1	66860
Tat	234724
Tbc1d16	207592
[truncated: 1,002 more rows]
