# Supplementary material for: Comparative Analysis of Gene Regulation by the Transcription Factor PPARα between Mouse and Human
Source: PLoS One. 2009 Aug 27;4(8):e6796. doi: 10.1371/journal.pone.0006796 (PMC2729378; doi:10.1371/journal.pone.0006796)
Supplement: Table S2 — Overlapping and species-specific list of Overrepresented Gene Ontology Classes in mouse and human primary hepatocytes after treatment with Wy14643 (6 h and/or 24 h), based on a functional class score method, FDR<0.0001. GO classes in bold font are species specifically overrepresented. (0.06 MB XLS) [file pone.0006796.s006.xls]

## Sheet: Table S2
Table S2
ID	Name	NumGenes	RawScore	Pval	CorrectedPvalue
GO:0006637	acyl-CoA metabolic process	11	3.27986	1e-12	8.504e-11	M
GO:0016290	palmitoyl-CoA hydrolase activity	10	2.60433	1e-12	1.304e-10	O
GO:0016289	CoA hydrolase activity	13	2.47266	1e-12	6.31e-11	U
GO:0016291	acyl-CoA thioesterase activity	11	2.39888	1e-12	9.314e-11	S
GO:0016863	intramolecular oxidoreductase activity, transposing C=C bonds	11	2.34912	1e-12	3.315e-11	E
GO:0006635	fatty acid beta-oxidation	12	2.32363	1e-12	5.286e-11
GO:0009062	fatty acid catabolic process	15	1.97907	1e-12	1.087e-10
GO:0005504	fatty acid binding	12	1.90446	1e-12	9.78e-10
GO:0019203	carbohydrate phosphatase activity	9	1.88847	1e-12	6.986e-11
GO:0006732	coenzyme metabolic process	28	1.85305	1e-12	3.556e-11
GO:0008299	isoprenoid biosynthetic process	11	1.73365	1e-12	1.222e-10
GO:0019395	fatty acid oxidation	18	1.72684	1e-12	3.691e-11
GO:0003995	acyl-CoA dehydrogenase activity	17	1.68335	1e-12	3.912e-11
GO:0032787	monocarboxylic acid metabolic process	86	1.64218	1e-12	3.372e-11
GO:0006720	isoprenoid metabolic process	12	1.61604	1e-12	3.762e-11
GO:0001676	long-chain fatty acid metabolic process	13	1.53211	1e-12	2.445e-10
GO:0005777	peroxisome	83	1.40762	1e-12	3.105e-11
GO:0031903	microbody membrane	13	1.38286	1e-12	5.147e-11
GO:0006090	pyruvate metabolic process	18	1.37566	1e-12	3.992e-11
GO:0006631	fatty acid metabolic process	117	1.36392	1e-12	3.155e-11
GO:0016627	oxidoreductase activity, acting on the CH-CH group of donors	30	1.32112	1e-12	3.26e-11
GO:0005778	peroxisomal membrane	14	1.28563	5e-06	8.891e-05
GO:0009072	aromatic amino acid family metabolic process	16	1.27322	5e-06	9.056e-05
GO:0006094	gluconeogenesis	14	1.23765	5e-06	8.97e-05
GO:0006776	vitamin A metabolic process	17	1.22973	1e-12	2.173e-10
GO:0044255	cellular lipid metabolic process	117	1.2165	1e-12	3.26e-10
GO:0044439	peroxisomal part	17	1.20271	1e-12	4.252e-11
GO:0019319	hexose biosynthetic process	16	1.17415	5e-06	8.73e-05
GO:0006576	biogenic amine metabolic process	16	1.17004	5e-06	8.89e-05
GO:0007031	peroxisome organization and biogenesis	19	1.13096	1e-12	3.835e-11
GO:0016620	oxidoreductase activity, acting on the aldehyde or oxo group of donors, NAD or NADP as acceptor	20	1.12621	1e-12	7.523e-11
GO:0006695	cholesterol biosynthetic process	19	1.11545	1e-12	1.956e-09
GO:0016126	sterol biosynthetic process	26	1.09959	1e-12	4.657e-11
GO:0050660	FAD binding	55	1.04806	1e-12	6.52e-11
GO:0050381	unspecific monooxygenase activity	25	1.03408	1e-12	1.397e-10
GO:0030554	adenyl nucleotide binding	58	1.01754	1e-12	9.78e-11
GO:0016712	oxidoreductase activity, acting on paired donors	31	0.973935	1e-12	1.956e-10
GO:0004091	carboxylesterase activity	80	0.949353	1e-12	8.891e-11
GO:0006006	glucose metabolic process	46	0.944094	1e-12	6.745e-11
GO:0016616	oxidoreductase activity, acting on the CH-OH group of donors, NAD or NADP as acceptor	67	0.936247	1e-12	3.432e-11
GO:0050662	coenzyme binding	118	0.932548	1e-12	1.029e-10
GO:0048037	cofactor binding	74	0.916738	1e-12	5.015e-11
GO:0019752	carboxylic acid metabolic process	27	0.915971	1e-12	9.78e-11
GO:0016811	hydrolase activity, acting on carbon-nitrogen (but not peptide) bonds, in linear amides	31	0.882124	1e-12	1.63e-10
GO:0051789	response to protein stimulus	25	0.872741	5e-06	9.14e-05
GO:0016782	transferase activity, transferring sulfur-containing groups	32	0.868038	1e-12	7.824e-11
GO:0004497	monooxygenase activity	94	0.851799	1e-12	7.244e-11
GO:0030170	pyridoxal phosphate binding	46	0.838341	1e-12	1.505e-10
GO:0006520	amino acid metabolic process	45	0.83071	1e-12	1.778e-10
GO:0050817	coagulation	40	0.824459	1e-12	4.549e-11
GO:0007599	hemostasis	42	0.812335	1e-12	6.112e-11
GO:0016836	hydro-lyase activity	46	0.806161	1e-12	5.589e-11
GO:0006694	steroid biosynthetic process	56	0.801652	1e-12	1.151e-10
GO:0004857	enzyme inhibitor activity	34	0.801565	1.947e-10	5.217e-09
GO:0008146	sulfotransferase activity	37	0.796062	9.658e-12	2.82e-10
GO:0042626	ATPase activity, coupled to transmembrane movement of substances	34	0.783784	8.145e-10	2.069e-08
GO:0022857	transmembrane transporter activity	46	0.779351	1e-12	6.52e-10
GO:0043492	ATPase activity, coupled to movement of substances	45	0.755874	1e-12	5.927e-11
GO:0042445	hormone metabolic process	40	0.745164	1.06e-10	2.921e-09
GO:0009607	response to biotic stimulus	45	0.742045	1e-12	3.622e-11
GO:0016125	sterol metabolic process	61	0.7402	1e-12	5.753e-11
GO:0016705	oxidoreductase activity, acting on paired donors, with incorporation or reduction of molecular oxygen	61	0.73935	1e-12	2.794e-10
GO:0020037	heme binding	96	0.738464	1e-12	4.162e-11
GO:0008202	steroid metabolic process	94	0.732328	1e-12	3.207e-11
GO:0008203	cholesterol metabolic process	61	0.730566	1e-12	4.445e-11
GO:0016853	isomerase activity	111	0.730053	1e-12	4.771e-11
GO:0007596	blood coagulation	48	0.729883	3.441e-12	1.052e-10
GO:0042060	wound healing	60	0.724657	1e-12	3.493e-11
GO:0016829	lyase activity	112	0.714957	1e-12	5.433e-11
GO:0051540	metal cluster binding	42	0.707146	3.307e-09	8.086e-08
GO:0004867	serine-type endopeptidase inhibitor activity	78	0.697909	1e-12	4.075e-11
GO:0045087	innate immune response	63	0.693467	1e-12	3.912e-10
GO:0015405	P-P-bond-hydrolysis-driven transmembrane transporter activity	45	0.692145	1.885e-10	5.121e-09
GO:0019842	vitamin binding	103	0.68438	1e-12	8.15e-11
GO:0008610	lipid biosynthetic process	109	0.682465	1e-12	4.89e-10
GO:0019867	outer membrane	32	0.670085	2.342e-06	4.491e-05
GO:0004866	endopeptidase inhibitor activity	111	0.663734	1e-12	4.347e-11
GO:0006956	complement activation	33	0.659357	4.468e-06	8.244e-05
GO:0005789	endoplasmic reticulum membrane	49	0.658461	5.006e-09	1.194e-07
GO:0030234	enzyme regulator activity	40	0.657664	1.866e-07	3.925e-06
GO:0005581	collagen	35	0.656398	5.323e-06	9.379e-05
GO:0019318	hexose metabolic process	45	0.655819	6.399e-09	1.49e-07
GO:0042175	nuclear envelope-endoplasmic reticulum network	41	0.653211	2.618e-07	5.39e-06
GO:0030414	protease inhibitor activity	86	0.640682	1e-12	4.89e-11
GO:0016820	hydrolase activity, acting on acid anhydrides, catalyzing transmembrane movement of substances	59	0.636391	4.149e-09	1.002e-07
GO:0006817	phosphate transport	72	0.633027	1.192e-11	3.429e-10
GO:0009055	electron carrier activity	76	0.632226	8.926e-12	2.645e-10
GO:0001503	ossification	72	0.611117	2.078e-10	5.492e-09
GO:0001558	regulation of cell growth	77	0.598898	7.326e-10	1.886e-08
GO:0031090	organelle membrane	96	0.591573	4.642e-12	1.397e-10
GO:0008201	heparin binding	60	0.587027	4.58e-07	9.142e-06
GO:0045595	regulation of cell differentiation	62	0.586161	8.659e-08	1.882e-06
GO:0016798	hydrolase activity, acting on glycosyl bonds	72	0.584497	5.236e-09	1.234e-07
GO:0015293	symporter activity	91	0.581436	1.055e-09	2.645e-08
GO:0040008	regulation of growth	89	0.580675	1.165e-09	2.884e-08
GO:0005201	extracellular matrix structural constituent	58	0.578007	1.002e-06	1.961e-05
GO:0005539	glycosaminoglycan binding	77	0.57739	9.949e-09	2.263e-07
GO:0006796	phosphate metabolic process	81	0.571818	1.897e-08	4.266e-07
GO:0044432	endoplasmic reticulum part	62	0.571181	3.687e-07	7.435e-06
GO:0031225	anchored to membrane	112	0.564094	4.46e-11	1.246e-09
GO:0006869	lipid transport	61	0.562444	3.665e-06	6.893e-05
GO:0043069	negative regulation of programmed cell death	71	0.561765	6.659e-08	1.464e-06
GO:0015291	secondary active transmembrane transporter activity	114	0.560177	3.548e-11	1.006e-09
GO:0016887	ATPase activity	75	0.557205	1.083e-07	2.303e-06
GO:0042578	phosphoric ester hydrolase activity	84	0.556201	2.457e-08	5.462e-07
GO:0006954	inflammatory response	114	0.544727	4.247e-10	1.107e-08
GO:0003002	regionalization	87	0.536001	2.5e-07	5.202e-06
GO:0009790	embryonic development	75	0.533675	1.178e-06	2.281e-05
GO:0030145	manganese ion binding	117	0.524592	8.698e-09	2.002e-07
GO:0009056	catabolic process	75	0.520663	4.031e-06	7.51e-05
GO:0043067	regulation of programmed cell death	94	0.520326	1.053e-07	2.263e-06
GO:0016042	lipid catabolic process	74	0.518317	4.999e-06	9.138e-05
GO:0044431	Golgi apparatus part	97	0.511887	2.912e-07	5.934e-06
GO:0007017	microtubule-based process	115	0.491537	7.313e-07	1.445e-05
GO:0043065	positive regulation of apoptosis	122	0.481293	2.531e-06	4.806e-05
GO:0006635	fatty acid beta-oxidation	18	2.83725	1e-12	8.779e-11
GO:0004467	long-chain-fatty-acid-CoA ligase activity	9	2.3409	1e-12	8.428e-11	H
GO:0009062	fatty acid catabolic process	25	2.2784	1e-12	1.915e-10	U
GO:0019395	fatty acid oxidation	26	2.22661	1e-12	5.695e-11	M
GO:0005811	lipid particle	10	2.16902	5e-06	8.295e-05	A
GO:0004033	aldo-keto reductase activity	12	1.78693	1e-12	6.385e-11	N
GO:0009065	glutamine family amino acid catabolic process	12	1.75407	5e-06	8.428e-05
GO:0003995	acyl-CoA dehydrogenase activity	15	1.68272	1e-12	6.197e-11
GO:0008206	bile acid metabolic process	15	1.6145	1e-12	1.003e-10
GO:0032787	monocarboxylic acid metabolic process	78	1.57171	1e-12	5.403e-11
GO:0006807	nitrogen compound metabolic process	14	1.54702	5e-06	8.167e-05
GO:0016712	oxidoreductase activity, acting on paired donors	28	1.43183	1e-12	3.512e-10
GO:0050381	unspecific monooxygenase activity	23	1.41051	1e-12	2.341e-10
GO:0008483	transaminase activity	21	1.33878	5e-06	8.361e-05
GO:0044255	cellular lipid metabolic process	124	1.30221	1e-12	5.268e-10
GO:0006725	cellular aromatic compound metabolic process	21	1.30013	5e-06	8.23e-05
GO:0006631	fatty acid metabolic process	122	1.29504	1e-12	4.9e-11
GO:0005778	peroxisomal membrane	36	1.26148	1e-12	5.017e-11
GO:0044439	peroxisomal part	38	1.23809	1e-12	7.023e-11
GO:0005777	peroxisome	85	1.15893	1e-12	4.789e-11
GO:0005319	lipid transporter activity	50	1.11335	1e-12	6.02e-11
GO:0004497	monooxygenase activity	70	1.06187	1e-12	1.317e-10
GO:0031968	organelle outer membrane	66	1.05359	1e-12	7.023e-10
GO:0006520	amino acid metabolic process	67	1.04687	1e-12	3.01e-10
GO:0005741	mitochondrial outer membrane	56	1.04407	1e-12	1.109e-10
GO:0016836	hydro-lyase activity	44	1.04072	1e-12	9.577e-11
GO:0016616	oxidoreductase activity, acting on the CH-OH group of donors, NAD or NADP as acceptor	74	1.02438	1e-12	5.545e-11
GO:0007586	digestion	50	1.01969	1e-12	1.405e-10
GO:0030170	pyridoxal phosphate binding	51	1.01273	1e-12	2.634e-10
GO:0016705	oxidoreductase activity, acting on paired donors, with incorporation or reduction of molecular oxygen	42	0.998586	1e-12	4.214e-10
GO:0006006	glucose metabolic process	52	0.992697	1e-12	1.239e-10
GO:0050660	FAD binding	65	0.980822	1e-12	1.171e-10
GO:0051258	protein polymerization	43	0.967889	1e-12	2.107e-10
GO:0019318	hexose metabolic process	55	0.961862	1e-12	7.266e-11
GO:0016811	hydrolase activity, acting on carbon-nitrogen (but not peptide) bonds, in linear amides	36	0.954149	1.207e-11	5.191e-10
GO:0042493	response to drug	44	0.952452	1.019e-12	4.773e-11
GO:0042445	hormone metabolic process	37	0.941663	3.155e-11	1.254e-09
GO:0030554	adenyl nucleotide binding	73	0.937616	1e-12	1.756e-10
GO:0020037	heme binding	104	0.918886	1e-12	6.797e-11
GO:0009605	response to external stimulus	44	0.917963	1.819e-11	7.666e-10
GO:0046467	membrane lipid biosynthetic process	35	0.901756	8.364e-09	2.35e-07
GO:0048037	cofactor binding	81	0.89896	1e-12	8.104e-11
GO:0006519	cellular amino acid and derivative metabolic process	45	0.898792	1e-12	5.853e-11
GO:0008654	phospholipid biosynthetic process	38	0.887985	1.565e-09	4.921e-08
GO:0006979	response to oxidative stress	76	0.884771	1e-12	1.054e-09
GO:0007584	response to nutrient	37	0.882959	2.213e-09	6.858e-08
GO:0006865	amino acid transport	34	0.871461	5.183e-08	1.348e-06
GO:0046394	carboxylic acid biosynthetic process	44	0.87133	6.859e-10	2.369e-08
GO:0031980	mitochondrial lumen	115	0.863008	1e-12	7.804e-11
GO:0009108	coenzyme biosynthetic process	34	0.861378	9.301e-08	2.306e-06
GO:0008202	steroid metabolic process	98	0.8601	1e-12	5.139e-11
GO:0009308	cellular amine metabolic process	47	0.843885	5.308e-11	1.997e-09
GO:0044249	cellular biosynthetic process	87	0.842026	1e-12	2.107e-09
GO:0019842	vitamin binding	122	0.838052	1e-12	1.505e-10
GO:0031667	response to nutrient levels	39	0.828157	7.898e-08	2.029e-06
GO:0016788	hydrolase activity, acting on ester bonds	58	0.818855	2.014e-11	8.163e-10
GO:0051704	multi-organism process	51	0.809144	7.636e-10	2.554e-08
GO:0009055	electron carrier activity	91	0.808916	1e-12	1.053e-10
GO:0019898	extrinsic to membrane	40	0.801821	8.708e-08	2.184e-06
GO:0019825	oxygen binding	33	0.80051	2.503e-06	4.507e-05
GO:0001666	response to hypoxia	46	0.790772	4.209e-09	1.267e-07
GO:0004857	enzyme inhibitor activity	50	0.788303	4.227e-09	1.254e-07
GO:0005543	phospholipid binding	105	0.786785	1e-12	6.584e-11
GO:0042626	ATPase activity, coupled to transmembrane movement of substances	40	0.785444	2.471e-07	5.659e-06
GO:0016829	lyase activity	100	0.784638	1e-12	9.161e-11
GO:0008217	regulation of blood pressure	44	0.784624	2.601e-07	5.893e-06
GO:0006633	fatty acid biosynthetic process	41	0.780184	3.427e-07	7.522e-06
GO:0008203	cholesterol metabolic process	76	0.779993	1e-12	7.525e-11
GO:0010033	response to organic substance	37	0.774191	1.844e-06	3.565e-05
GO:0007631	feeding behavior	37	0.774024	1.861e-06	3.565e-05
GO:0022414	reproductive process	53	0.763731	2.877e-08	7.772e-07
GO:0006796	phosphate metabolic process	46	0.759709	4.358e-08	1.148e-06
GO:0006869	lipid transport	87	0.759279	1e-12	5.267e-11
GO:0019752	carboxylic acid metabolic process	59	0.751093	9.205e-09	2.519e-07
GO:0030323	respiratory tube development	40	0.746078	2.602e-06	4.647e-05
GO:0044449	contractile fiber part	50	0.742311	1.402e-07	3.397e-06
GO:0040007	growth	60	0.736743	2.989e-08	7.971e-07
GO:0000079	regulation of cyclin-dependent protein kinase activity	50	0.735664	2.255e-07	5.222e-06
GO:0045121	membrane raft	51	0.73004	3.35e-07	7.43e-06
GO:0007018	microtubule-based movement	87	0.719039	3.374e-11	1.316e-09
GO:0009058	biosynthetic process	83	0.717661	3.933e-10	1.381e-08
GO:0005539	glycosaminoglycan binding	98	0.71564	1.264e-12	5.789e-11
GO:0007565	female pregnancy	57	0.715414	1.593e-07	3.815e-06
GO:0030705	cytoskeleton-dependent intracellular transport	90	0.714735	5.64e-11	2.085e-09
GO:0009725	response to hormone stimulus	49	0.712387	1.124e-06	2.213e-05
GO:0043623	cellular protein complex assembly	79	0.71229	6.986e-10	2.374e-08
GO:0043122	regulation of I-kappaB kinase/NF-kappaB cascade	95	0.706854	4.149e-12	1.86e-10
GO:0032991	macromolecular complex	124	0.706476	1e-12	1.621e-10
GO:0008201	heparin binding	76	0.705555	1.419e-09	4.53e-08
GO:0016125	sterol metabolic process	51	0.69857	2.766e-06	4.897e-05
GO:0006644	phospholipid metabolic process	76	0.697282	3.33e-09	1.017e-07
GO:0010740	positive regulation of protein kinase cascade	100	0.695053	1.96e-11	8.099e-10
GO:0043123	positive regulation of I-kappaB kinase/NF-kappaB cascade	88	0.691482	8.191e-10	2.697e-08
GO:0008219	cell death	60	0.689451	1.08e-06	2.167e-05
GO:0051674	localization of cell	120	0.672983	1.163e-11	5.106e-10
GO:0019904	protein domain specific binding	106	0.670601	5.252e-11	2.012e-09
GO:0065008	regulation of biological quality	112	0.66368	1.31e-10	4.759e-09
GO:0030234	enzyme regulator activity	78	0.662032	1.014e-07	2.484e-06
GO:0007050	cell cycle arrest	81	0.655977	1.759e-07	4.165e-06
GO:0004091	carboxylesterase activity	75	0.653299	3.318e-07	7.437e-06
GO:0006091	generation of precursor metabolites and energy	97	0.64972	4.795e-09	1.403e-07
GO:0010324	membrane invagination	94	0.64764	6.063e-09	1.75e-07
GO:0007017	microtubule-based process	121	0.647434	3.907e-10	1.395e-08
GO:0008610	lipid biosynthetic process	93	0.64727	6.321e-09	1.8e-07
GO:0019901	protein kinase binding	65	0.646308	5.518e-06	8.944e-05
GO:0015293	symporter activity	98	0.644601	8.519e-09	2.362e-07
GO:0048699	generation of neurons	79	0.644361	4.922e-07	1.069e-05
GO:0019899	enzyme binding	117	0.639863	1.049e-09	3.4e-08
GO:0006812	cation transport	69	0.63906	1.083e-06	2.153e-05
GO:0007596	blood coagulation	78	0.637615	8.789e-07	1.798e-05
GO:0045859	regulation of protein kinase activity	69	0.631744	1.948e-06	3.665e-05
GO:0009056	catabolic process	83	0.627267	2.086e-06	3.856e-05
GO:0006817	phosphate transport	80	0.623446	2.849e-06	5.003e-05
GO:0003714	transcription corepressor activity	106	0.60957	8.614e-08	2.187e-06
GO:0030029	actin filament-based process	104	0.602587	1.829e-07	4.281e-06
GO:0042330	taxis	111	0.59182	5.621e-07	1.196e-05
GO:0006486	protein amino acid glycosylation	99	0.590897	2.014e-06	3.755e-05
GO:0007610	behavior	99	0.589326	2.327e-06	4.227e-05
GO:0000165	MAPKKK cascade	108	0.588373	7.975e-07	1.664e-05
GO:0006935	chemotaxis	112	0.588057	8.234e-07	1.701e-05
GO:0016791	phosphatase activity	114	0.587261	5.093e-07	1.095e-05
GO:0050954	sensory perception of mechanical stimulus	123	0.583162	7.849e-07	1.654e-05
GO:0004252	serine-type endopeptidase activity	97	0.583083	4.096e-06	7.132e-05
GO:0007605	sensory perception of sound	125	0.581026	9.806e-07	1.987e-05
GO:0016477	cell migration	111	0.580681	1.712e-06	3.34e-05
GO:0006936	muscle contraction	121	0.574686	1.877e-06	3.563e-05
GO:0005085	guanyl-nucleotide exchange factor activity	125	0.572574	2.321e-06	4.253e-05
GO:0008236	serine-type peptidase activity	104	0.570171	4.682e-06	7.956e-05
GO:0005815	microtubule organizing center	121	0.566403	4.273e-06	7.38e-05
GO:0031225	anchored to membrane	118	0.566217	4.351e-06	7.454e-05
GO:0001501	skeletal development	115	0.56363	5.592e-06	8.994e-05
