# Supplementary material for: Comparative Analysis of Gene Regulation by the Transcription Factor PPARα between Mouse and Human
Source: PLoS One. 2009 Aug 27;4(8):e6796. doi: 10.1371/journal.pone.0006796 (PMC2729378; doi:10.1371/journal.pone.0006796)
Supplement: Table S3 — Overlapping and species-specific list of induced gene sets in mouse and human primary hepatocytes after treatment with Wy14643 (6 h and/or 24 h), gene sets included between 15 and 250 genes and FDR<0.25. (0.02 MB XLS) [file pone.0006796.s007.xls]

## Sheet: Table S3
Table S3
Induced Gene Sets
MM_TRIACYLGLYCERIDE_SYNTHESIS_BIGCAT	M
GLYCOLYSIS___GLUCONEOGENESIS	O
RHO_CELL_MOTILITY_SIGNALING_PATHWAY	U
METS_AFFECT_ON_MACROPHAGE_DIFFERENTIATION	S
BENZOATE_DEGRADATION_VIA_COA_LIGATION	E
PENTOSE_PHOSPHATE_PATHWAY
CARBON_FIXATION
LYSINE_DEGRADATION
TRYPTOPHAN_METABOLISM
ASCORBATE_AND_ALDARATE_METABOLISM
SIG_INSULIN_RECEPTOR_PATHWAY_IN_CARDIAC_MYOCYTES
MM_KREBS-TCA_CYCLE
MM_GLYCOLYSIS_AND_GLUCONEOGENESIS
METABOLISM_OF_XENOBIOTICS_BY_CYTOCHROME_P450
NUCLEAR_RECEPTORS_IN_LIPID_METABOLISM_AND_TOXICITY	H
TNFR2_SIGNALING_PATHWAY	U
HS_NUCLEAR_RECEPTORS_IN_LIPID_METABOLISM_AND_TOXICITY	M
HYPOXIA_AND_P53_IN_THE_CARDIOVASCULAR_SYSTEM	A
P53_SIGNALING_PATHWAY	N
HS_INFLAMMATORY_RESPONSE_PATHWAY
GLYCOSPHINGOLIPID_BIOSYNTHESIS_-_NEO-LACTOSERIES
HS_STATIN_PATHWAY_PHARMGKB
GLYCAN_STRUCTURES_-_BIOSYNTHESIS_2
CELL_CYCLE_G2_M_CHECKPOINT
LINOLEIC_ACID_METABOLISM
OXIDATIVE_STRESS_INDUCED_GENE_EXPRESSION_VIA_NRF2
ARACHIDONIC_ACID_METABOLISM
TOLL-LIKE_RECEPTOR_PATHWAY
ABC_TRANSPORTERS_-_GENERAL
ALKALOID_BIOSYNTHESIS_II
MECHANISM_OF_GENE_REGULATION_BY_PEROXISOME_PROLIFERATORS_VIA_PPARA(ALPHA)
NUCLEOTIDE_SUGARS_METABOLISM
NOTCH_SIGNALING_PATHWAY
CYSTEINE_METABOLISM
HS_OXIDATIVE_STRESS
HS_CYTOKINES_AND_INFLAMMATORY_RESPONSE_BIOCARTA
GAMMA-HEXACHLOROCYCLOHEXANE_DEGRADATION
FATTY_ACID_METABOLISM
MM_FATTY_ACID_BETA_OXIDATION_META_BIGCAT	M
PEROXISOMAL_FATTY_ACID_OXIDATION	O
PPAR_SIGNALING_PATHWAY	U
MM_FATTY_ACID_BETA_OXIDATION_1_BIGCAT	S
MITOCHONDRIAL_FATTY_ACID_OXIDATION	E
MM_MITOCHONDRIAL_FATTY_ACID_BETAOXIDATION	&
MISCELLANEOUS_LIPID_METABOLISM_(LIST_IS_BIASED_TOWARDS_PUTATIVE_PPARA_TARGETS)	H
BETA-ALANINE_METABOLISM	U
ADIPOCYTOKINE_SIGNALING_PATHWAY	M
MM_FATTY_ACID_SYNTHESIS_BIGCAT	A
PROPANOATE_METABOLISM	N
LIMONENE_AND_PINENE_DEGRADATION
LIPOGENESIS
BUTANOATE_METABOLISM
GLYCEROLIPID_METABOLISM
VALINE,_LEUCINE_AND_ISOLEUCINE_DEGRADATION
BILE_ACID_BIOSYNTHESIS
PYRUVATE_METABOLISM
LIPOPROTEIN_METABOLISM
